# Supplementary material for: Large Rashba splitting, carrier mobility, and valley polarization in a 1T-SnS2/MoTe2 heterostructure
Source: Royal Society of Chemistry journal article supplement (doi:10.1039/d1cp02039k), 2021-01-01
Supplement: d1cp02039k1.pdf [file d1cp02039k1.pdf]

## Large Rashba splitting, carriers mobility and Valley polarization in 1T-SnS<sub>2</sub>/MoTe<sub>2</sub> heterostructure

Sukai Teng<sup>a</sup>, Jia Li<sup>a\*</sup>, Xiujuan Mao<sup>a</sup>, Fuli He<sup>a</sup>, Ze Liu<sup>a</sup>, Jiayi Wang<sup>a</sup>, Yafan Wang<sup>a</sup>,

<sup>a</sup>*School of Science, Hebei University of Technology, Tianjin 300401, People's*

*Republic of China*

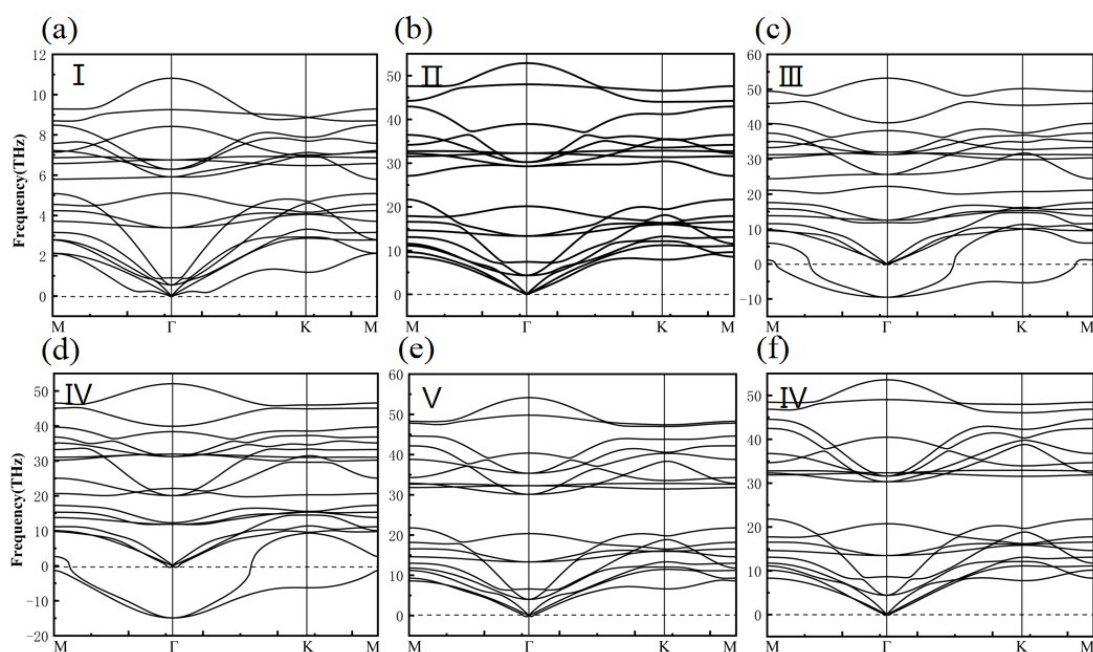

Fig S1. (a)-(f) Calculated phonon spectra for the six possible stacking configurations.

---

\* Corresponding author. Tel.: +86 22 60435638; Fax:+86 22 60435639.  
E-mail address: jiali@hebut.edu.cn (Jia Li).

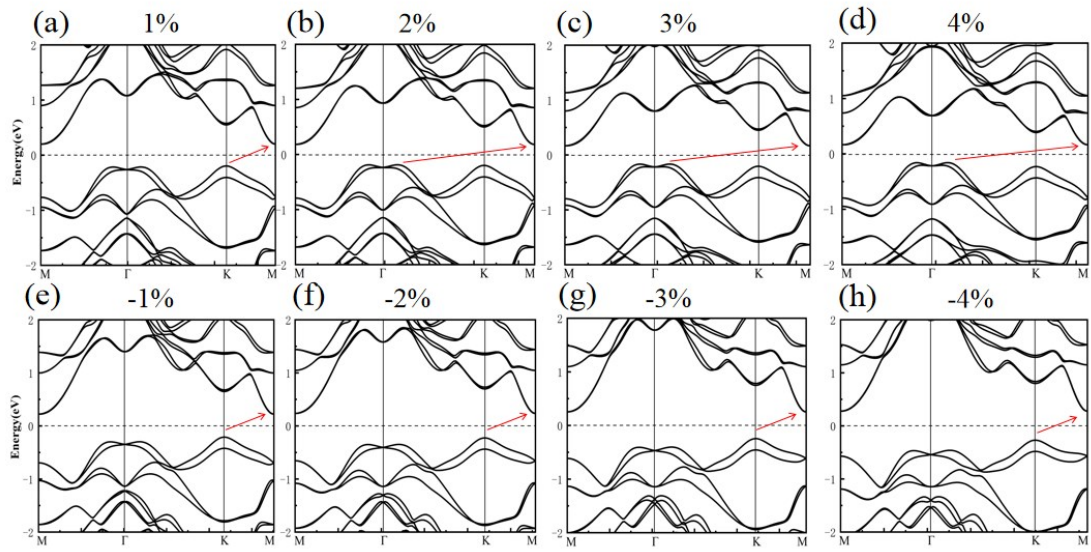

Fig S2. (a)-(h) Band structures of the 1T-SnS<sub>2</sub>/MoTe<sub>2</sub> heterostructure with biaxial strain.
